# Supplementary material
Source: Springer Nature journal article supplement (https://www.springermedizin.de/resource/supplementary/12936_2012_2553_MOESM9_ESM.pdf/9543036)

**Number of malaria outpatients**

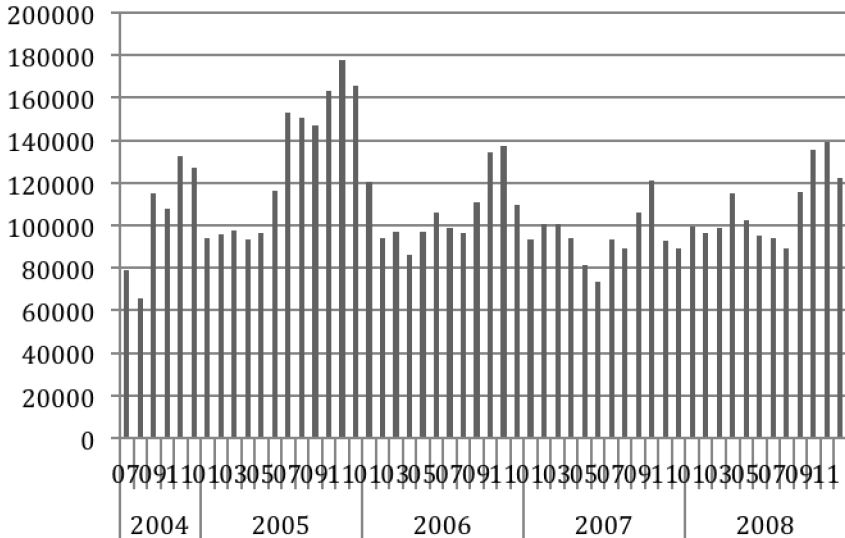

Supplement: MOESM9 [file 9543036]
